# Supplementary material for: Shelf-Life Evaluation of “San Marzano” Dried Tomato Slices Preserved in Extra Virgin Olive Oil
Source: MDPI journal article supplement (doi:10.3390/foods10081706), 2021-07-23
Supplement: s1 [file s1]

## Supplementary materials

**Table S1.** Moisture (%) and water activity of dried tomatoes samples storage in light and dark.

| Months | DTL                        |                             | DTD                        |                            | ^Sign. | #Sign. |
|--------|----------------------------|-----------------------------|----------------------------|----------------------------|--------|--------|
|        | ^Moisture (%)              | #a <sub>w</sub>             | ^Moisture (%)              | #a <sub>w</sub>            |        |        |
| 0      | 31.66 ± 2.01 <sup>oA</sup> | 0.63 ± 0.06 <sup>dB</sup>   | 31.66 ± 2.01 <sup>oA</sup> | 0.63 ± 0.06 <sup>bB</sup>  | ns     | ns     |
| 1      | 31.86 ± 2.07 <sup>nA</sup> | 0.65 ± 0.06 <sup>cdB</sup>  | 31.87 ± 2.07 <sup>nA</sup> | 0.66 ± 0.06 <sup>abB</sup> | ns     | ns     |
| 2      | 32.18 ± 2.00 <sup>mA</sup> | 0.67 ± 0.07 <sup>bcC</sup>  | 32.01 ± 2.00 <sup>mB</sup> | 0.67 ± 0.06 <sup>abC</sup> | *      | ns     |
| 3      | 32.82 ± 2.08 <sup>lA</sup> | 0.67 ± 0.07 <sup>bcC</sup>  | 32.66 ± 2.31 <sup>lB</sup> | 0.67 ± 0.06 <sup>abC</sup> | *      | ns     |
| 4      | 34.30 ± 2.34 <sup>iA</sup> | 0.68 ± 0.06 <sup>bcC</sup>  | 32.96 ± 2.53 <sup>iB</sup> | 0.68 ± 0.06 <sup>abC</sup> | **     | ns     |
| 5      | 35.59 ± 2.41 <sup>hA</sup> | 0.68 ± 0.06 <sup>bcC</sup>  | 33.18 ± 2.46 <sup>hB</sup> | 0.68 ± 0.06 <sup>abC</sup> | **     | ns     |
| 6      | 35.93 ± 2.49 <sup>gA</sup> | 0.68 ± 0.07 <sup>bcC</sup>  | 33.91 ± 2.61 <sup>gB</sup> | 0.68 ± 0.06 <sup>abC</sup> | **     | ns     |
| 7      | 36.66 ± 2.52 <sup>fA</sup> | 0.68 ± 0.06 <sup>bcC</sup>  | 34.10 ± 2.63 <sup>fB</sup> | 0.68 ± 0.06 <sup>abC</sup> | **     | ns     |
| 8      | 37.82 ± 2.60 <sup>eA</sup> | 0.68 ± 0.06 <sup>bcC</sup>  | 34.15 ± 2.66 <sup>eB</sup> | 0.68 ± 0.06 <sup>abC</sup> | **     | ns     |
| 9      | 37.86 ± 2.59 <sup>dA</sup> | 0.69 ± 0.07 <sup>abcC</sup> | 35.73 ± 2.61 <sup>dB</sup> | 0.68 ± 0.06 <sup>abC</sup> | **     | ns     |
| 10     | 37.97 ± 2.61 <sup>cA</sup> | 0.70 ± 0.08 <sup>abC</sup>  | 36.76 ± 2.63 <sup>cB</sup> | 0.69 ± 0.07 <sup>abC</sup> | **     | ns     |
| 11     | 40.00 ± 2.68 <sup>bA</sup> | 0.70 ± 0.08 <sup>abC</sup>  | 36.80 ± 2.68 <sup>bB</sup> | 0.69 ± 0.07 <sup>abC</sup> | **     | ns     |
| 12     | 40.04 ± 2.69 <sup>aA</sup> | 0.71 ± 0.08 <sup>aC</sup>   | 37.63 ± 2.66 <sup>aB</sup> | 0.69 ± 0.07 <sup>aD</sup>  | **     | *      |
| Sign.  | **                         | **                          | **                         | *                          |        |        |

Data are reported as mean ± standard deviation (n = 3). Differences were evaluated by one-way analysis of variance (ANOVA) test completed with a multicomparison Tukey's test. Means in the same row with different capital letters differ significantly ( $p < 0.05$ ), means in the same column with different small letters differ significantly ( $p < 0.05$ ). ns: not significance; \* Significance at  $p < 0.05$ , \*\* Significance at  $p < 0.01$ .

**Table S2.** Chlorophylls and TCC in EVOO, EVOO\_DTL and EVOO\_DTD samples (mg/Kg).

| Months       | EVOO                     |                          | EVOO_DTL                 |                          | EVOO_DTD                 |                          | ^Sign. | #Sign. |
|--------------|--------------------------|--------------------------|--------------------------|--------------------------|--------------------------|--------------------------|--------|--------|
|              | ^Chlorophylls            | #TCC                     | ^Chlorophylls            | #TCC                     | ^Chlorophylls            | #TCC                     |        |        |
| 0            | 66.17±4.23 <sup>aA</sup> | 22.45±3.33 <sup>aB</sup> | 66.17±5.36 <sup>aA</sup> | 22.45±2.33 <sup>aB</sup> | 66.17±6.03 <sup>aA</sup> | 22.45±2.23 <sup>iB</sup> | ns     | ns     |
| 1            | 63.51±4.56 <sup>bB</sup> | 21.25±3.12 <sup>bF</sup> | 56.89±4.89 <sup>bC</sup> | 22.75±2.88 <sup>bE</sup> | 63.74±5.33 <sup>bA</sup> | 25.78±2.21 <sup>aD</sup> | **     | **     |
| 2            | 47.27±3.02 <sup>cC</sup> | 20.86±3.63 <sup>cE</sup> | 51.43±4.02 <sup>cA</sup> | 20.21±3.03 <sup>hF</sup> | 48.23±5.23 <sup>cB</sup> | 24.37±2.26 <sup>dD</sup> | **     | **     |
| 3            | 46.68±3.56 <sup>dA</sup> | 18.95±2.89 <sup>dF</sup> | 42.45±4.23 <sup>dC</sup> | 19.97±3.05 <sup>mE</sup> | 46.59±4.26 <sup>dB</sup> | 23.77±2.25 <sup>gD</sup> | **     | **     |
| 4            | 42.77±3.88 <sup>eB</sup> | 17.73±2.85 <sup>eF</sup> | 40.8±4.02 <sup>eC</sup>  | 18.16±3.11 <sup>nE</sup> | 44.12±4.56 <sup>eA</sup> | 23.08±2.24 <sup>hD</sup> | **     | **     |
| 5            | 38.49±4.02 <sup>fB</sup> | 17.45±4.02 <sup>fF</sup> | 37.6±3.56 <sup>fC</sup>  | 18.03±3.21 <sup>mE</sup> | 41.12±4.02 <sup>fA</sup> | 22.17±2.29 <sup>lD</sup> | **     | **     |
| 6            | 36.8±2.89 <sup>gB</sup>  | 16.79±3.03 <sup>gF</sup> | 35.4±4.03 <sup>gC</sup>  | 18.14±3.56 <sup>lE</sup> | 37.98±4.03 <sup>gA</sup> | 22.04±2.28 <sup>mD</sup> | **     | **     |
| 7            | 35.79±6.33 <sup>hA</sup> | 16.39±2.02 <sup>hF</sup> | 32.1±3.56 <sup>hC</sup>  | 19.42±2.55 <sup>iE</sup> | 35.61±3.96 <sup>hB</sup> | 23.12±2.27 <sup>hD</sup> | **     | **     |
| 8            | 35.7±2.11 <sup>iA</sup>  | 15.87±2.23 <sup>iF</sup> | 30.5±3.95 <sup>iC</sup>  | 19.76±2.34 <sup>gE</sup> | 35.18±3.85 <sup>iB</sup> | 23.87±1.99 <sup>gD</sup> | **     | **     |
| 9            | 32.01±2.56 <sup>lB</sup> | 13.47±2.56 <sup>lF</sup> | 29.57±3.02 <sup>lC</sup> | 20.11±2.22 <sup>eE</sup> | 32.87±3.74 <sup>lA</sup> | 23.95±3.03 <sup>fD</sup> | **     | **     |
| 10           | 31.44±3.02 <sup>mB</sup> | 12.73±2.87 <sup>mF</sup> | 27.34±3.11 <sup>mC</sup> | 20.57±3.02 <sup>dE</sup> | 32.44±3.46 <sup>mA</sup> | 24.2±3.05 <sup>eD</sup>  | **     | **     |
| 11           | 28.71±3.12 <sup>nB</sup> | 11.96±3.02 <sup>nF</sup> | 24.98±2.85 <sup>nC</sup> | 21.2±3.04 <sup>cE</sup>  | 30.12±3.25 <sup>nA</sup> | 24.56±2.23 <sup>cD</sup> | **     | **     |
| 12           | 28.65±2.89 <sup>oB</sup> | 11.78±3.06 <sup>oF</sup> | 23.1±2.66 <sup>oC</sup>  | 21.35±3.22 <sup>cE</sup> | 29.21±3.37 <sup>oA</sup> | 24.9±2.28 <sup>bD</sup>  | **     | **     |
| <b>Sign.</b> | <b>**</b>                | <b>**</b>                | <b>**</b>                | <b>**</b>                | <b>**</b>                | <b>**</b>                |        |        |

Data are reported as mean ± standard deviation (n = 3). Differences were evaluated by one-way analysis of variance (ANOVA) test completed with a multicomparison Tukey's test. Means in the same row with different capital letters differ significantly ( $p < 0.05$ ), means in the same column with different small letters differ significantly ( $p < 0.05$ ). ns: not significance; \*\* Significance at  $p < 0.01$ .

**Table S3.**  $\Delta E^*ab$  values during 12 months storage of EVOO, EVOO\_DTL and EVOO\_DTD samples.

| Months       | EVOO        | EVOO_DTD     | EVOO_DTL    | Sign. |
|--------------|-------------|--------------|-------------|-------|
| 0            | 0.00±0.00oA | 0.00±0.00nA  | 0.00±0.00oA | ns    |
| 1            | 0,77±0.03nB | 0,1±0.02nC   | 0,98±0.02mA | **    |
| 2            | 2,03±0.15mB | 1,39±0.12lC  | 2,26±0.88iA | **    |
| 3            | 5,39±0.86lB | 4,93±0.36dC  | 5,65±0.75cA | **    |
| 4            | 5,76±0.77iB | 5,34±0.45cC  | 6,15±0.88aA | **    |
| 5            | 6,53±1.02hA | 4,64±0.63eC  | 5,99±0.73bB | **    |
| 6            | 6,61±0.82gA | 2,69±0.57hC  | 5,46±0.79dB | **    |
| 7            | 6,68±0.45fA | 1,57±0.12iC  | 3,16±0.55eB | **    |
| 8            | 6,72±0.77eA | 1,08±0.09mC  | 2,78±0.24gB | **    |
| 9            | 6,82±0.56dA | 2,91±0.42gB  | 0,92±0.04nC | **    |
| 10           | 6,93±0.95cA | 4,18±0.23fB  | 1,52±0.06lC | **    |
| 11           | 7,01±0.93bB | 10,23±0.86bA | 2,6±0.12hC  | **    |
| 12           | 7,15±0.83aB | 15,03±0.97aA | 3,03±0.09fC | **    |
| <b>Sign.</b> | **          | **           | **          |       |

Data are reported as mean  $\pm$  standard deviation (n = 3). Differences were evaluated by one-way analysis of variance (ANOVA) test completed with a multicomparison Tukey's test. Means in the same row with different capital letters differ significantly ( $p < 0.05$ ), means in the same column with different small letters differ significantly ( $p < 0.05$ ). ns: not significance; \*\* Significance at  $p < 0.01$ .

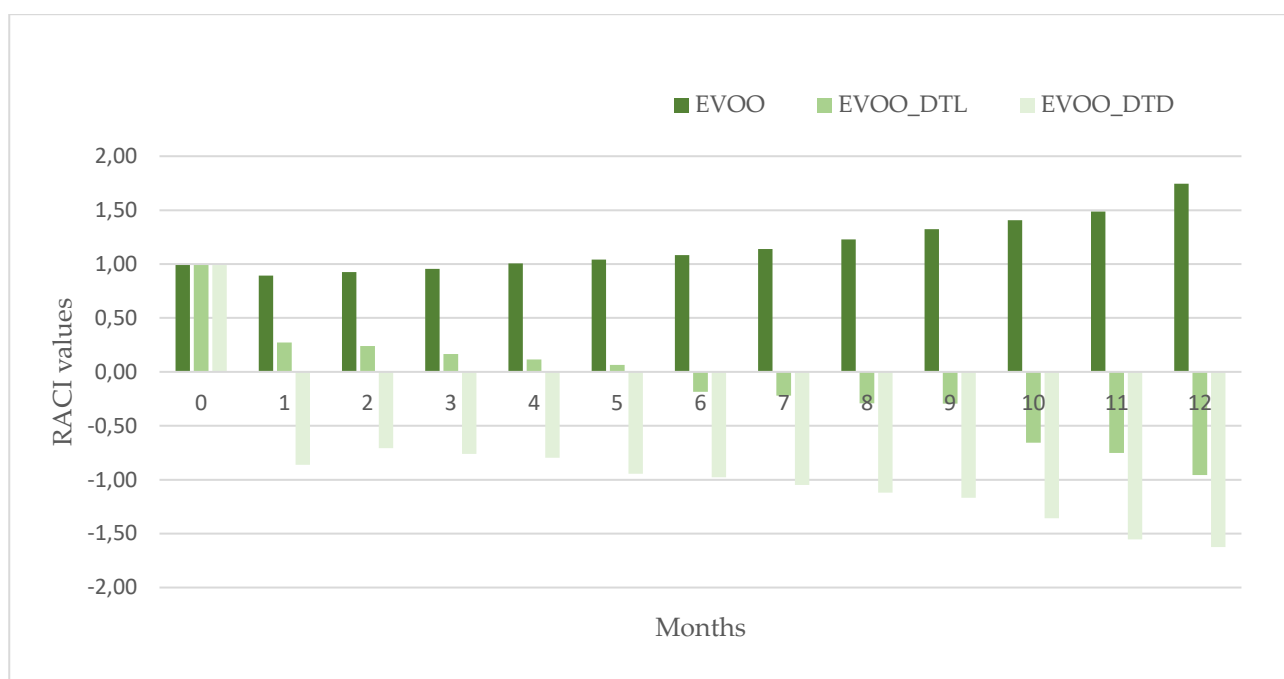

(a)

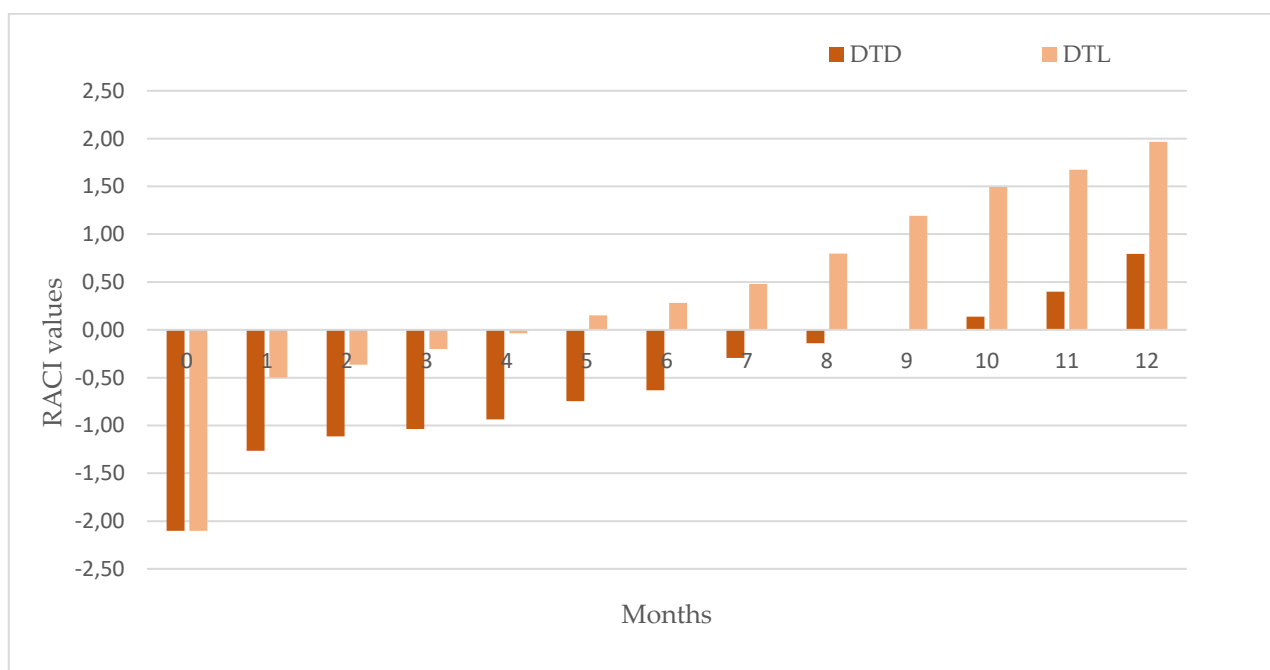

(b)

**Figure S1.** RACI values of EVOOs (a) and dried tomatoes (b) samples.
